# Supplementary material for: Hemodialysis Procedure–Associated Autonomic Imbalance and Cardiac Arrhythmias: Insights From Continuous 14‐Day ECG Monitoring
Source: PubMed Central journal article supplement — J Am Heart Assoc. 2019 Sep 28;8(19):e013748. doi: 10.1161/JAHA.119.013748 (PMC6806026; doi:10.1161/jaha.119.013748), 2019-09-28
Supplement: JAH3-8-e013748-s001.pdf [file JAH3-8-e013748-s001.pdf]

# **Supplemental Material**

**Table S1. Comparison of heart rate and HRV post-dialysis in a regular dialytic (every other day) cycle, after two-day long interdialytic interval, and after missed dialysis for more than 72 hours.**

| HRV measure                              | Post-dialysis in a regular dialytic cycle<br>N=350; n=26<br>T=13.5 | Post-dialysis after the long interdialytic weekend<br>N=122; n=21<br>T=5.8 | Within ANOVA P<br>Compared to phase 2 after the regular vs. weekend-long interdialytic interval | Post-dialysis after missed dialysis > 72h<br>N=9; n=2<br>T=4.5 | Within ANOVA P<br>Compared to phase 2 after regular vs. ultra-long (>72h) interdialytic interval |
|------------------------------------------|--------------------------------------------------------------------|----------------------------------------------------------------------------|-------------------------------------------------------------------------------------------------|----------------------------------------------------------------|--------------------------------------------------------------------------------------------------|
| Heart rate(within SD), bpm               | 81.4(7.4)                                                          | 81.8(7.2)                                                                  | 0.439                                                                                           | 71.3(2.8)                                                      | 0.377                                                                                            |
| rMSSD(within SD), ms                     | 9.6(3.5)                                                           | 10.1(3.3)                                                                  | 0.109                                                                                           | 11.1(1.8)                                                      | 0.372                                                                                            |
| HF power(within SD), s <sup>2</sup>      | 4.0(1.4)                                                           | 4.3(1.1)                                                                   | 0.081                                                                                           | 4.0(0.8)                                                       | 0.777                                                                                            |
| LF power(within SD), s <sup>2</sup>      | 3.0(0.8)                                                           | 3.0(0.8)                                                                   | 0.126                                                                                           | 3.3(0.8)                                                       | 0.788                                                                                            |
| LF/HF ratio(within SD), %                | 0.9(0.3)                                                           | 0.9(0.2)                                                                   | 0.615                                                                                           | 1.0(0.4)                                                       | 0.583                                                                                            |
| Poincaré SD <sub>1</sub> (within SD), ms | 6.8(2.5)                                                           | 7.1(2.3)                                                                   | 0.109                                                                                           | 7.9(1.3)                                                       | 0.372                                                                                            |
| Poincaré SD <sub>2</sub> (within SD), ms | 22.2(12.4)                                                         | 19.7(8.1)                                                                  | 0.401                                                                                           | 27.1(6.9)                                                      | 0.869                                                                                            |
| SD <sub>12</sub> (within SD), %          | 0.41(0.16)                                                         | 0.45(0.15)                                                                 | 0.070                                                                                           | 0.33(0.05)                                                     | 0.820                                                                                            |
| Sample Entropy(within SD)                | 1.4(0.4)                                                           | 1.4(0.3)                                                                   | 0.364                                                                                           | 1.6(0.5)                                                       | 0.990                                                                                            |
| Renyi Entropy(within SD)                 | 1.3(0.3)                                                           | 1.3(0.2)                                                                   | 0.192                                                                                           | 1.6(0.1)                                                       | 0.451                                                                                            |

N=number of observations; n=number of participants; T=average number of hours; SD=standard deviation; SD<sub>1</sub>=Poincaré plot

standard deviation perpendicular the line of identity; SD<sub>2</sub>=Poincaré plot standard deviation along the line of identity.

**Table S2. Association of demographic and clinical characteristics with heart rate and short-term HRV in ARCH models, stratified by the type of dialytic cycle.**

| Clinical characteristic                                  | Heart rate (95%CI), bpm | P                     | rMSSD (95%CI), ms | P                       | SD1 (95%CI), ms | P                       | HF power(95%CI), s <sup>2</sup> | P                     |         |
|----------------------------------------------------------|-------------------------|-----------------------|-------------------|-------------------------|-----------------|-------------------------|---------------------------------|-----------------------|---------|
| Regular dialytic cycle<br>(phases 1-4)                   | Age, /10y               | -2.9(-3.1 to -2.7)    | <0.0001           | +0.9(0.8-1.0)           | <0.0001         | +0.7(0.6-0.7)           | <0.0001                         | +0.4(0.3-0.5)         | <0.0001 |
|                                                          | Female sex              | +8.1(7.5-8.6)         | <0.0001           | +0.7(0.4-0.9)           | <0.0001         | +0.5(0.3-0.6)           | <0.0001                         | +0.05(-0.07-0.17)     | 0.437   |
|                                                          | Black race              | +23(-388-433)         | 0.927             | -2(-21 to 17)           | 0.825           | -2(-15 to 12)           | 0.824                           | -7(-21 to 6)          | 0.301   |
|                                                          | CAD                     | +4.5(3.8-5.3)         | <0.0001           | +0.03(-0.3 to 0.4)      | 0.849           | +0.02(-0.2 to 0.3)      | 0.846                           | -2.1(-2.2 to -1.9)    | <0.0001 |
|                                                          | CVD                     | +6.8(6.1-7.5)         | <0.0001           | -2.7(-3.1 to -2.4)      | <0.0001         | -1.9(-2.2 to -1.7)      | <0.0001                         | -0.5(-0.7 to -0.3)    | <0.0001 |
|                                                          | CHF                     | +2.3(1.5-3.1)         | <0.0001           | -2.4(-2.7 to -2.0)      | <0.0001         | -1.7(-1.9 to -1.4)      | <0.0001                         | +1.4(1.2-1.6)         | <0.0001 |
|                                                          | AF history              | -10.5(-11.0 to -10.1) | <0.0001           | +5.3(5.1-5.6)           | <0.0001         | +3.8(3.6-4.0)           | <0.0001                         | +0.6(0.5-0.8)         | <0.0001 |
|                                                          | Beta-blocker            | -10.1(-11.1 to -9.2)  | <0.0001           | -6.9(-7.5 to -6.4)      | <0.0001         | -4.9(-5.3 to -4.5)      | <0.0001                         | -1.33(-1.57 to -1.08) | <0.0001 |
|                                                          | Diabetes                | +1.1(0.6-1.5)         | <0.0001           | -1.8(-2.0 to -1.5)      | <0.0001         | -1.3(-1.4 to -1.1)      | <0.0001                         | +1.3(1.2-1.4)         | <0.0001 |
|                                                          | CCI                     | +1.2(1.1-1.3)         | <0.0001           | -0.5(-0.6 to -0.4)      | <0.0001         | -0.4(-0.03 to -0.01)    | <0.0001                         | -0.10(-0.13 to -0.07) | <0.0001 |
|                                                          | Recovery time, min      | +0.04(0.01-0.6)       | 0.012             | -0.03(-0.05 to -0.01)   | <0.0001         | -0.02(-0.03 to -0.01)   | <0.0001                         | -0.05(-0.06 to -0.04) | <0.0001 |
| 2 <sup>nd</sup> day interdialytic extension (phases 5-6) | Age, /10y               | -4.0(-4.4 to -3.7)    | <0.0001           | -0.2(-0.4-0.1)          | 0.265           | -1.0(-0.3 to 0.1)       | 0.274                           | +0.3(0.2-0.5)         | <0.0001 |
|                                                          | Female sex              | +3.8(2.8-4.8)         | <0.0001           | -1.5(-2.1 to -0.8)      | <0.0001         | -1.0(-1.5 to -0.6)      | <0.0001                         | +0.07(-0.24 to 0.38)  | 0.656   |
|                                                          | Black race              | -15(-21 to -9))       | <0.0001           | -8(-13 to -3)           | 0.003           | -5(-9 to -2)            | 0.004                           | -7.5(-9.8 to -5.1)    | <0.0001 |
|                                                          | CAD                     | -5.3(-6.7 to -4.0)    | <0.0001           | +0.06(-0.9 to 1.0)      | 0.906           | +0.04(-0.6 to 0.7)      | 0.903                           | -2.2(-2.8 to -1.7)    | <0.0001 |
|                                                          | CVD                     | +6.1(4.4-7.7)         | <0.0001           | -1.3(-2.3 to -0.4)      | 0.007           | -0.9(-1.6 to -0.3)      | 0.006                           | -0.7(-1.2 to -0.2)    | 0.004   |
|                                                          | CHF                     | +4.5(2.8-6.2)         | <0.0001           | -2.2(-3.3 to -1.2)      | <0.0001         | -1.6(-2.3 to -0.9)      | <0.0001                         | +1.2(0.6-1.8)         | <0.0001 |
|                                                          | AF history              | -2.3(-3.4 to -1.2)    | <0.0001           | +4.0(3.3-4.7)           | <0.0001         | +2.8(2.4-3.3)           | <0.0001                         | +1.2(0.9-1.6)         | <0.0001 |
|                                                          | Beta-blocker            | +2.6(0.9-4.2)         | 0.002             | -6.9(-8.5 to -5.4)      | <0.0001         | -4.9(-6.0 to -3.8)      | <0.0001                         | -1.33(-1.99 to -0.68) | <0.0001 |
|                                                          | Diabetes                | -2.4(-0.4 to 0.6)     | <0.0001           | +0.5(-0.2 to 1.1)       | 0.173           | +0.3(-0.1 to 0.8)       | 0.176                           | +1.9(1.6-2.2)         | <0.0001 |
|                                                          | CCI                     | +0.25(0.05-0.60)      | 0.100             | -0.3(-0.5 to -0.2)      | <0.0001         | -0.2(-0.3 to -0.1)      | <0.0001                         | -0.05(-0.12 to 0.03)  | 0.199   |
|                                                          | Recovery time, min      | -0.23(-0.29 to -0.17) | <0.0001           | -0.05(-0.10 to -0.0007) | 0.047           | -0.03(-0.07 to -0.0002) | 0.048                           | -0.06(-0.08 to -0.04) | <0.0001 |
| Phases 7-8                                               | Age, /10y               | -5.3(-5.8 to -4.7)    | <0.0001           | -0.20(-0.24 to -0.15)   | <0.0001         | -1.4(-1.7 to -1.0)      | <0.0001                         | +0.5(0.3-0.7)         | <0.0001 |
|                                                          | Diabetes                | -4.8(-6.0 to -3.6)    | <0.0001           | -1.6(-2.5 to -0.6)      | 0.001           | -1.10(-1.8 to -0.4)     | 0.001                           | +2.2(1.8-2.6)         | <0.0001 |
|                                                          | Recovery time, min      | +2.4(2.2-2.6)         | <0.0001           | +0.4(0.13-0.64)         | 0.003           | +0.3(0.09-0.5)          | 0.003                           | +0.3(0.2-0.5)         | <0.0001 |

**Table S3. Association of demographic and clinical characteristics with intermediate HRV in ARCH models, stratified by the type of dialytic cycle.**

| Clinical characteristic                                  | LF power(95%CI),<br>s <sup>2</sup> | P                     | LF/HF ratio<br>(95%CI) | P                     | SD1/SD2 ratio<br>(95%CI) | P                       | SD2 (95%CI), ms | P                     |         |
|----------------------------------------------------------|------------------------------------|-----------------------|------------------------|-----------------------|--------------------------|-------------------------|-----------------|-----------------------|---------|
| Regular dialytic cycle<br>(phases 1-4)                   | Age, /10y                          | -0.1(-1.0 to -0.04)   | <0.0001                | -0.08(-0.09 to -0.07) | <0.0001                  | +0.03(0.03-0.04)        | <0.0001         | -0.14(-0.17 to -0.11) | <0.0001 |
|                                                          | Female sex                         | +0.17(0.10-0.24)      | <0.0001                | -0.05(-0.07 to -0.02) | <0.0001                  | +0.02(0.01-0.04)        | <0.0001         | -0.3(-0.9 to 0.2)     | 0.190   |
|                                                          | Black race                         | +3.3(1.0-5.7)         | 0.005                  | +2.5(-1.2 to 6.2)     | 0.182                    | -0.9(-2.3-0.4)          | 0.177           | +32(-121 to 187)      | 0.678   |
|                                                          | CAD                                | +0.6(0.5-0.7)         | <0.0001                | +0.64(0.61-0.68)      | <0.0001                  | -0.2(-0.2 to -0.21)     | <0.0001         | +7.0(5.9-8.1)         | <0.0001 |
|                                                          | CVD                                | -0.15(-0.26 to -0.05) | 0.005                  | -0.05(-0.08 to -0.01) | 0.009                    | -0.03(-0.05 to -0.01)   | 0.002           | -1.8(-2.6 to -1.0)    | <0.0001 |
|                                                          | CHF                                | -0.62(-0.74 to -0.50) | <0.0001                | -0.52(-0.56 to -0.48) | <0.0001                  | +0.19(0.17-0.21)        | <0.0001         | -3.1(-4.3 to -1.9)    | <0.0001 |
|                                                          | AF history                         | -0.07(-0.15 to 0.01)  | 0.102                  | -0.23(-0.26 to -0.21) | <0.0001                  | +0.03(0.02-0.05)        | <0.0001         | +5.3(4.7-5.9)         | <0.0001 |
|                                                          | Beta-blocker                       | -0.02(-1.17 to 0.14)  | 0.810                  | +0.34(0.30-0.39)      | <0.0001                  | -0.05(-0.08 to -0.03)   | <0.0001         | +6.4(5.0-7.7)         | <0.0001 |
|                                                          | Diabetes                           | -0.59(-0.67 to -0.52) | <0.0001                | -0.40(-0.42 to -0.38) | <0.0001                  | 0.20(0.19-0.22)         | <0.0001         | -19.4(-20.1 to -18.7) | <0.0001 |
|                                                          | CCI                                | +0.02(0.01-0.04)      | 0.011                  | +0.05(0.04-0.05)      | <0.0001                  | -0.01(-0.01to-0.01)     | <0.0001         | -0.9(-1.0 to -0.7)    | <0.0001 |
|                                                          | Recovery time, min                 | +0.03(0.02-0.03)      | <0.0001                | +0.021(0.019-0.22)    | <0.0001                  | -0.01(-0.01to-0.01)     | <0.0001         | +0.32(0.29-0.35)      | <0.0001 |
| 2 <sup>nd</sup> day interdialytic extension (phases 5-6) | Age, /10y                          | +0.04(-0.03-0.1)      | 0.265                  | -0.06(-0.08 to -0.03) | <0.0001                  | +0.01(-0.004-0.03)      | 0.139           | -1.0(-2.0 to -1.0)    | <0.0001 |
|                                                          | Female sex                         | +0.13(-0.05 to 0.31)  | 0.170                  | -0.03(-0.10 to 0.03)  | 0.296                    | +0.03(-0.008-0.06)      | 0.133           | -1.3(-2.7 to 0.5)     | 0.058   |
|                                                          | Black race                         | +3.0(1.5-4.5)         | <0.0001                | +1.8(1.4-2.2)         | <0.0001                  | -1.0(-1.3 to -0.7)      | <0.0001         | +37(26-47)            | <0.0001 |
|                                                          | CAD                                | +0.5(0.2-0.7)         | <0.0001                | +0.51(0.43-0.59)      | <0.0001                  | -0.2(-0.3 to -0.2)      | <0.0001         | +8.2(6.0-10.5)        | <0.0001 |
|                                                          | CVD                                | -0.4(-0.7 to -0.2)    | 0.001                  | +0.001(-0.09-0.10)    | 0.983                    | -0.03(-0.1-0.04)        | 0.426           | -3.4(-6.1 to -0.7)    | 0.015   |
|                                                          | CHF                                | -0.7(-1.0 to -0.4)    | <0.0001                | -0.32(-0.42 to -0.22) | <0.0001                  | +0.19(0.12-0.25)        | <0.0001         | -4.5(-7.2 to -1.8)    | 0.001   |
|                                                          | AF history                         | -0.2(-0.4 to -0.02)   | 0.027                  | -0.2(-0.3 to -0.1)    | <0.0001                  | +0.07(0.03-0.12)        | 0.001           | +4.5(2.3-6.7)         | <0.0001 |
|                                                          | Beta-blocker                       | -0.20(-0.55 to 0.14)  | 0.247                  | +0.27(0.16-0.39)      | <0.0001                  | -0.12(-0.21 to -0.04)   | 0.004           | -0.1(-0.2 to -0.8)    | <0.0001 |
|                                                          | Diabetes                           | -0.7(-0.9 to -0.6)    | <0.0001                | -0.5(-0.6 to -0.4)    | <0.0001                  | +0.22(0.18-0.26)        | <0.0001         | -20(-22 to -19)       | <0.0001 |
|                                                          | CCI                                | +0.03(0.02-0.05)      | 0.276                  | +0.02(0.01-0.04)      | <0.0001                  | -0.004(-0.1-0.01)       | 0.930           | -0.6(-1.1 to -0.2)    | 0.009   |
|                                                          | Recovery time, min                 | +0.03(0.02-0.05)      | <0.0001                | +0.02(0.01-0.02)      | <0.0001                  | -0.008(-0.01 to -0.005) | <0.0001         | +0.4(0.3-0.5)         | <0.0001 |
| Phases 7-8                                               | Age, /10y                          | +0.2(0.1-0.3)         | 0.001                  | -0.01(-0.10-0.03)     | 0.740                    | -0.02(-0.05 to -0.001)  | 0.041           | -0.8(-2.0 to 0.1)     | 0.100   |
|                                                          | Diabetes                           | -1.4(-1.6 to -1.2)    | <0.0001                | -0.47(-0.53 to -0.41) | <0.0001                  | +0.43(0.39-0.47)        | <0.0001         | -14.6(-16.0 to -13.3) | <0.0001 |
|                                                          | Recovery time, min                 | +0.11(0.06-0.16)      | <0.0001                | -0.08(-0.09 to -0.06) | <0.0001                  | +0.03(0.02-0.04)        | <0.0001         | -4.3(-4.7 to -3.8)    | <0.0001 |

**Table S4. Association of demographic and clinical characteristics with entropy in ARCH models, stratified by the type of dialytic cycle**

|                                                             | Clinical characteristic | Sample entropy (95%CI), bpm | P       | Renyi entropy (95%CI), ms | P       |
|-------------------------------------------------------------|-------------------------|-----------------------------|---------|---------------------------|---------|
| Regular dialytic cycle<br>(phases 1-4)                      | Age, per 10y            | +0.06(0.05-0.08)            | <0.0001 | -0.007(-0.02 to 0.003)    | 0.189   |
|                                                             | Female sex              | +0.08(0.05-0.11)            | <0.0001 | -0.03(-0.06 to -0.001)    | 0.006   |
|                                                             | Black race              | +0.3(-0.6 to 1.2)           | 0.530   | -0.19(-0.43 to 0.06)      | 0.138   |
|                                                             | CAD                     | +0.0004(-0.05 to 0.05)      | 0.988   | +0.0005(-0.03 to 0.03)    | 0.974   |
|                                                             | CVD                     | -0.18(-0.23 to -0.14)       | <0.0001 | +0.0001(-0.03 to 0.03)    | 0.992   |
|                                                             | CHF                     | +0.01(-0.04 to 0.06)        | 0.709   | +0.02(-0.02 to 0.06)      | 0.244   |
|                                                             | AF history              | +0.11(0.07-0.14)            | <0.0001 | +0.09(0.06-0.12)          | <0.0001 |
|                                                             | Beta-blocker            | -0.13(-0.20 to -0.07)       | <0.0001 | +0.02(-0.03 to 0.07)      | 0.469   |
|                                                             | Diabetes                | -0.10(-0.13 to -0.07)       | <0.0001 | -0.07(-0.09 to -0.04)     | <0.0001 |
|                                                             | CCI                     | -0.002(-0.01 to 0.005)      | 0.567   | -0.006(-0.01 to 0.0001)   | 0.052   |
|                                                             | Recovery time, min      | +0.002(-0.0001 to 0.004)    | 0.051   | -0.003(-0.005 to -0.001)  | <0.0001 |
| 2 <sup>nd</sup> day interdialytic extension<br>(phases 5-6) | Age, per 10y            | +0.05(0.02-0.09)            | <0.0001 | -0.003(-0.003 to 0.02)    | 0.832   |
|                                                             | Female sex              | -0.01(-0.06 to 0.09)        | 0.713   | -0.06(-0.11 to -0.001)    | 0.045   |
|                                                             | Black race              | +0.4(-0.2 to 1.0)           | 0.200   | +0.03(-0.4 to 0.4)        | 0.914   |
|                                                             | CAD                     | +0.13(0.02-0.24)            | 0.017   | +0.09(0.005-0.18)         | 0.037   |
|                                                             | CVD                     | -0.24(-0.36 to -0.13)       | <0.0001 | -0.10(-0.18 to -0.02)     | 0.018   |
|                                                             | CHF                     | -0.15(-0.28 to -0.02)       | 0.022   | -0.05(-0.02 to 0.05)      | 0.295   |
|                                                             | AF history              | +0.06(-0.03 to 0.14)        | 0.193   | +0.11(0.04-0.17)          | 0.001   |
|                                                             | Beta-blocker            | -0.17(-0.32 to -0.03)       | 0.016   | +0.07(-0.05 to 0.18)      | 0.275   |
|                                                             | Diabetes                | +0.02(-0.06 to 0.09)        | 0.653   | -0.08(-0.13 to -0.02)     | 0.009   |
|                                                             | CCI                     | +0.01(-0.002 to 0.1)        | 0.090   | -0.01(-0.02 to 0.004)     | 0.151   |
|                                                             | Recovery time, min      | +0.005(-0.0002 to 0.10)     | 0.062   | -0.001(-0.005 to 0.003)   | 0.733   |
| Phases<br>7-8                                               | Age, per 1y             | -0.003(-0.008 to 0.003)     | 0.360   | +0.03(-0.008 to 0.07)     | 0.116   |
|                                                             | Diabetes                | -0.51(-0.61 to -0.42)       | <0.0001 | -0.16(-0.23 to -0.08)     | <0.0001 |
|                                                             | Recovery time, min      | +0.11(0.09-0.14)            | <0.0001 | +0.006(-0.002 to 0.01)    | 0.126   |

**Table S5. Comparison of circadian rhythm in heart rate and HRV during different interdialytic phases.**

| HR / HRV metric      | Regular interdialytic interval (phases 3-4) |                           |                      |                   | 2 <sup>nd</sup> day of a long interdialytic interval (phases 5-6) |                           |                    |                | Nonadherent interdialytic extension (phases 7-8) |                           |                    |                  |
|----------------------|---------------------------------------------|---------------------------|----------------------|-------------------|-------------------------------------------------------------------|---------------------------|--------------------|----------------|--------------------------------------------------|---------------------------|--------------------|------------------|
|                      | Mesor (95%CI)                               | 24-hour Amplitude (95%CI) | Peak time (95%CI)    | P Sin Cos         | Mesor (95%CI)                                                     | 24-hour Amplitude (95%CI) | Peak time (95%CI)  | P Sin Cos      | Mesor (95%CI)                                    | 24-hour Amplitude (95%CI) | Peak time (95%CI)  | P Sin Cos        |
| HR, bpm              | 75.4(74.6-76.3)                             | 6.8(5.6-8.6)              | 07:44(06:52 - 08:14) | <0.0001           | 74.8(72.9-76.7)                                                   | 6.9(5.2-11.1)             | 07:30(06:08-10:44) | 0.008<br>0.020 | 73.7(71.9-75.6)                                  | 8.3(3.4-13.4)             | 15:30(14:15-15:48) | 0.006<br><0.0001 |
| rMSSD, ms            | 10.6(0.9-11.2)                              | 1.5(1.0-3.1)              | 02:01(20:22-03:16)   | 0.342<br><0.0001  | NS                                                                | NS                        | NS                 | 0.067<br>0.182 | 8.7(7.2-10.2)                                    | 6.8(2.7-10.9)             | 05:05(04:47-06:18) | 0.001<br>0.085   |
| HF, s <sup>2</sup>   | 4.6(4.5-4.8)                                | 1.0(0.6-1.5)              | 17:28(17:04-18:23)   | <0.0001<br>0.166  | 4.9(4.5-5.3)                                                      | 1.1(0.2-2.2)              | 16:54(16:36-22:39) | 0.038<br>0.202 | NS                                               | NS                        | NS                 | 0.604<br>0.235   |
| LF, s <sup>2</sup>   | 3.2(3.1-3.3)                                | 0.44(0.17-0.72)           | 16:50(16:38-17:34)   | 0.001<br>0.022    | NS                                                                | NS                        | NS                 | 0.090<br>0.163 | 3.5(3.1-3.8)                                     | 1.0(0.1-1.9)              | 16:16(16:00-16:17) | 0.032<br>0.028   |
| LF/HF                | 0.82(0.78-0.85)                             | 0.14(0.06-0.24)           | 05:49(05:11-08:34)   | 0.003<br>0.770    | NS                                                                | NS                        | NS                 | 0.271<br>0.246 | 0.83(0.73-0.93)                                  | 0.42(0.14-0.71)           | 16:31(16:26-16:59) | 0.003<br>0.012   |
| SD <sub>1</sub> , ms | 7.5(7.1-7.9)                                | 1.1(0.7-2.2)              | 02:00(20:22-03:15)   | 0.343<br>0<0.0001 | NS                                                                | NS                        | NS                 | 0.067<br>0.182 | 6.2(5.1-7.2)                                     | 4.8(1.9-7.8)              | 05:05(04:47-06:18) | 0.001<br>0.085   |
| SD <sub>2</sub> , ms | 21.7(20.2-23.2)                             | 6.6(2.9-10.8)             | 02:58(00:47-03:31)   | 0.025<br><0.0001  | 18.7(15.0-22.3)                                                   | 11.7(1.9-21.9)            | 03:56(01:53-04:06) | 0.032<br>0.007 | NS                                               | NS                        | NS                 | 0.067<br>0.784   |
| SD <sub>12</sub>     | 0.45(0.43-0.47)                             | 0.057(0.008-0.12)         | 15:54(07:58-16:08)   | 0.088<br>0.023    | NS                                                                | NS                        | NS                 | 0.112<br>0.078 | NS                                               | NS                        | NS                 | 0.450<br>0.789   |
| SamEn                | 1.37(1.32-1.42)                             | 0.081(0.077-0.204)        | 02:08(18:41-03:30)   | 0.478<br>0.014    | NS                                                                | NS                        | NS                 | 0.877<br>0.825 | NS                                               | NS                        | NS                 | 0.631<br>0.117   |
| RenEn                | 1.28(1.25-1.31)                             | 0.11(0.02-0.20)           | 05:03(04:43-08:31)   | 0.019<br>0.195    | 1.21(1.12-1.30)                                                   | 0.25(0.08-0.48)           | 05:28(04:54-10:07) | 0.022<br>0.506 | NS                                               | NS                        | NS                 | 0.420<br>0.163   |

NS=non-significant (absent circadian rhythm)

**Table S6. Association of phase of dialysis with heart rate and HRV after adjustment for circadian rhythm, clinical characteristics.**

| HR / HRV metric          | Dialysis & postdialysis (phases 1-2)                   |         | Regular interdialytic phases 3-4                       |         | 2 <sup>nd</sup> day interdialytic extension (phases 5-6) |         | Nonadherent interdialytic extension (phases 7-8)       |       |
|--------------------------|--------------------------------------------------------|---------|--------------------------------------------------------|---------|----------------------------------------------------------|---------|--------------------------------------------------------|-------|
|                          | per 24-h remoteness from 1 <sup>st</sup> dialysis hour | P       | per 24-h remoteness from 1 <sup>st</sup> dialysis hour | P       | per 24-h remoteness from 1 <sup>st</sup> dialysis hour   | P       | per 24-h remoteness from 1 <sup>st</sup> dialysis hour | P     |
| HR, bpm                  | -0.76(-0.95 to -0.57)                                  | <0.0001 | +0.02(-0.05 to 0.11)                                   | 0.495   | +0.57(0.26-0.87)                                         | <0.0001 | +0.20(-0.17 to 0.57)                                   | 0.285 |
| rMSSD, ms                | +0.20(0.12-0.29)                                       | <0.0001 | -0.05(-0.09 to -0.001)                                 | 0.044   | -1.41(-1.67 to -1.15)                                    | <0.0001 | +0.10(-0.41 to 0.60)                                   | 0.710 |
| HF power, s <sup>2</sup> | +0.04(-0.002 to 0.09)                                  | 0.061   | -0.006(-0.03 to 0.02)                                  | 0.588   | -0.38(-0.50 to -0.25)                                    | <0.0001 | +0.24(0.06-0.42)                                       | 0.010 |
| LF power, s <sup>2</sup> | +0.02(-0.002 to 0.05)                                  | 0.073   | +0.002(-0.010 to 0.02)                                 | 0.703   | -0.02(-0.08 to 0.05)                                     | 0.639   | -0.04(-0.04 to 0.12)                                   | 0.322 |
| LF/HF                    | -0.004(-0.01 to 0.003)                                 | 0.246   | -0.001(-0.005 to 0.003)                                | 0.504   | +0.04(0.01 to 0.06)                                      | 0.002   | -0.01(-0.03 to 0.01)                                   | 0.157 |
| SD <sub>1</sub> , ms     | +0.14(0.08-0.21)                                       | <0.0001 | -0.03(-0.07 to -0.001)                                 | 0.043   | -1.00(-1.19 to -0.81)                                    | <0.0001 | +0.07(-0.29 to 0.42)                                   | 0.709 |
| SD <sub>2</sub> , ms     | -0.04(-0.26 to 0.18)                                   | 0.706   | +0.27(0.17-0.37)                                       | <0.0001 | +0.87(0.37-1.37)                                         | 0.001   | -0.35(-0.81 to 0.12)                                   | 0.148 |
| SD <sub>12</sub>         | -0.003(-0.008 to 0.002)                                | 0.219   | -0.0006(-0.003 to 0.002)                               | 0.597   | -0.06(-0.07 to -0.05)                                    | <0.0001 | +0.02(0.004-0.04)                                      | 0.017 |
| SamEn                    | +0.006(-0.005 to 0.018)                                | 0.287   | +0.01(0.005 to 0.02)                                   | <0.0001 | +0.007(-0.022 to 0.037)                                  | 0.624   | -0.005(-0.047 to 0.036)                                | 0.795 |
| RenEn                    | +0.002(-0.002 to 0.005)                                | 0.345   | +0.004(-0.0005 to 0.008)                               | 0.088   | +0.02(0.002 to 0.04)                                     | 0.030   | -0.01(-0.05 to 0.03)                                   | 0.764 |

**Table S7. Sensitivity analysis after exclusion of epochs starting in the 2<sup>nd</sup> half of an hour: Association of the dialytic cycle with HRV.**

| HR / HRV metric          | Dialysis & postdialysis (phases 1-2)                   |         | Regular interdialytic phases 3-4                       |         | 2nd day interdialytic extension (phases 5-6) |         | Nonadherent interdialytic extension (phases 7-8) |       |
|--------------------------|--------------------------------------------------------|---------|--------------------------------------------------------|---------|----------------------------------------------|---------|--------------------------------------------------|-------|
|                          | per 24-h remoteness from 1 <sup>st</sup> dialysis hour | P       | per 24-h remoteness from 1 <sup>st</sup> dialysis hour | P       | per 24-h remoteness from 1st dialysis hour   | P       | per 24-h remoteness from 1st dialysis hour       | P     |
| HR, bpm                  | -0.60(-0.79 to -0.41)                                  | <0.0001 | +0.02(-0.06 to 0.10)                                   | 0.612   | +1.1(0.63-1.51)                              | <0.0001 | -0.06(-0.55 to 0.45)                             | 0.828 |
| rMSSD, ms                | +0.20(0.10 to 0.30)                                    | <0.0001 | -0.07(-0.11 to -0.02)                                  | 0.006   | -1.51(-1.80 to -1.23)                        | <0.0001 | +0.33(-0.24 to 0.91)                             | 0.257 |
| HF power, s <sup>2</sup> | +0.04(-0.008 to 0.09)                                  | 0.103   | -0.01(-0.03 to 0.01)                                   | 0.332   | -0.36(-0.50 to -0.23)                        | <0.0001 | +0.26(0.06-0.47)                                 | 0.013 |
| LF power, s <sup>2</sup> | +0.02(-0.008 – 0.05)                                   | 0.176   | +0.003(-0.010-0.02)                                    | 0.665   | +0.04(-0.04 to 0.12)                         | 0.319   | +0.07(-0.12 to 0.15)                             | 0.093 |
| LF/HF                    | -0.006(-0.01 to 0.003)                                 | 0.180   | -0.002(-0.006 to 0.002)                                | 0.349   | +0.05(0.02 to 0.08)                          | 0.001   | -0.01(-0.04 to 0.01)                             | 0.377 |
| SD <sub>1</sub> , ms     | +0.14(0.07-0.21)                                       | <0.0001 | -0.05(-0.08 to -0.01)                                  | 0.005   | -1.07(-1.28 to -0.87)                        | <0.0001 | +0.23(-0.17 to 0.65)                             | 0.257 |
| SD <sub>2</sub> , ms     | -0.20(-0.43 to 0.04)                                   | 0.103   | +0.29(0.18-0.39)                                       | <0.0001 | +0.52(-0.13-1.18)                            | 0.119   | -0.87(-1.62 to -0.12)                            | 0.023 |
| SD <sub>12</sub>         | -0.004(-0.009-0.0009)                                  | 0.111   | -0.001(-0.004-0.001)                                   | 0.275   | -0.06(-0.08 to -0.05)                        | <0.0001 | +0.02(0.004-0.04)                                | 0.017 |
| SamEn                    | +0.003(-0.009-0.02)                                    | 0.595   | +0.010(0.004-0.015)                                    | 0.001   | 0.006(-0.028 to 0.040)                       | 0.733   | +0.01(-0.033 to 0.055)                           | 0.631 |
| RenEn                    | +0.002(-0.002-0.006)                                   | 0.243   | +0.004(-0.0003-0.008)                                  | 0.069   | +0.02(0.002 to 0.04)                         | 0.030   | -0.01(-0.05 to 0.03)                             | 0.764 |



**Table S8. Sensitivity analysis adjusted for weight and blood pressure change: Association of the dialytic cycle with HRV**

**(N=7). All 7 participants were on beta-blockers.**

| HR / HRV metric          | Dialysis & postdialysis (phases 1-2)                   |                   | Regular interdialytic phases 3-4                       |              | 2nd day interdialytic extension (phases 5-6)           |                   |
|--------------------------|--------------------------------------------------------|-------------------|--------------------------------------------------------|--------------|--------------------------------------------------------|-------------------|
|                          | per 24-h remoteness from 1 <sup>st</sup> dialysis hour | P                 | per 24-h remoteness from 1 <sup>st</sup> dialysis hour | P            | per 24-h remoteness from 1 <sup>st</sup> dialysis hour | P                 |
| HR, bpm                  | +0.34(-0.03 to 0.70)                                   | 0.071             | +0.11(-0.08 to 0.29)                                   | 0.272        | <b>+0.82(0.44-1.20)</b>                                | <b>&lt;0.0001</b> |
| rMSSD, ms                | <b>-0.24(-0.45 to -0.20)</b>                           | <b>0.032</b>      | -0.04(-0.11 to 0.03)                                   | 0.233        | +0.91(-2.30 to 4.10)                                   | 0.581             |
| HF power, s <sup>2</sup> | -0.001(-0.04 to 0.04)                                  | 0.952             | -0.0003(-0.05 to 0.05)                                 | 0.992        | +0.01(-0.04 to 0.06)                                   | 0.612             |
| LF power, s <sup>2</sup> | +0.01(-0.03 to 0.06)                                   | 0.626             | <b>-0.04(-0.07 to -0.01)</b>                           | <b>0.003</b> | <b>-0.03(-0.06 to -0.005)</b>                          | <b>0.022</b>      |
| LF/HF                    | -0.004(-0.02 to 0.01)                                  | 0.658             | -0.007(-0.02 to 0.001)                                 | 0.085        | -0.008(-0.02 to 0.002)                                 | 0.122             |
| SD <sub>1</sub> , ms     | <b>-0.17(-0.32 to -0.01)</b>                           | <b>0.032</b>      | -0.03(-0.08 to 0.02)                                   | 0.233        | +0.65(-1.63 to 2.92)                                   | 0.578             |
| SD <sub>2</sub> , ms     | <b>-0.80(-1.05 to -0.55)</b>                           | <b>&lt;0.0001</b> | -0.08(-0.39 to 0.23)                                   | 0.619        | -1.21(-5.32 to 2.91)                                   | 0.565             |
| SD <sub>12</sub>         | +0.002(-0.01 to 0.01)                                  | 0.761             | +0.0004(-0.0006 to 0.007)                              | 0.903        | <b>-0.22(-0.40 to -0.04)</b>                           | <b>0.015</b>      |
| SamEn                    | +0.004(-0.006 to 0.01)                                 | 0.441             | +0.002(-0.01 to 0.02)                                  | 0.798        | -0.12(-0.45 to 0.21)                                   | 0.461             |
| RenEn                    | <b>+0.02(0.007 – 0.03)</b>                             | <b>0.001</b>      | <b>+0.01(0.002 – 0.02)</b>                             | <b>0.020</b> | <b>+0.01(0.001-0.02)</b>                               | <b>0.024</b>      |
